# Supplementary material
Source: PubMed Central journal article supplement (PMC8013098)
Supplement: 2306_table.pdf [file 2306_table.pdf]

**On-line Table: Geometric and hemodynamic results for the 4 selected aneurysms and for all 10 aneurysms**

| Variable                 | 4 Selected Aneurysms |       |       |       |       |       |       |       | All 10 Aneurysms |      |          |        |
|--------------------------|----------------------|-------|-------|-------|-------|-------|-------|-------|------------------|------|----------|--------|
|                          | 1                    |       | 6     |       | 9     |       | 10    |       | M                | P    | Δ        |        |
|                          | 3DRA                 | CTA   | 3DRA  | CTA   | 3DRA  | CTA   | 3DRA  | CTA   |                  |      | Mean (%) | SE (%) |
| $A_N$ (mm <sup>2</sup> ) | 10.87                | 11.16 | 5.40  | 7.86  | 7.33  | 12.17 | 12.15 | 12.26 | 1                | 0.05 | 33.0     | 8.3    |
| $V_A$ (mm <sup>3</sup> ) | 99.97                | 90.72 | 36.35 | 50.72 | 63.43 | 69.04 | 17.74 | 20.11 | 3                | 0.38 | 27.8     | 7.4    |
| $Q_P$ (mL/s)             | 0.80                 | 0.93  | 1.31  | 0.99  | 0.76  | 0.89  | 0.43  | 0.45  | 3                | 0.85 | 14.1     | 2.8    |
| $Q_A$ (mL/s)             | 0.25                 | 0.27  | 0.31  | 0.28  | 0.32  | 0.42  | 0.14  | 0.12  | 4                | 0.38 | 33.9     | 7.6    |
| $NQ_A$ (-)               | 0.31                 | 0.29  | 0.24  | 0.28  | 0.42  | 0.48  | 0.33  | 0.27  | 4                | 0.63 | 35.9     | 9.8    |
| $WSS_P$ (Pa)             | 2.33                 | 3.14  | 6.34  | 2.79  | 3.93  | 4.51  | 1.01  | 0.79  | 6                | 0.28 | 28.6     | 4.0    |
| $WSS_A$ (Pa)             | 0.29                 | 0.48  | 1.68  | 0.81  | 0.98  | 1.51  | 0.33  | 0.23  | 4                | 0.43 | 44.2     | 6.0    |
| $NWSS_A$ (-)             | 0.13                 | 0.15  | 0.26  | 0.29  | 0.25  | 0.33  | 0.33  | 0.30  | 2                | 0.04 | 31.4     | 9.9    |
| $LWSS_A$ (%)             | 98.41                | 96.52 | 75.32 | 86.81 | 79.60 | 67.04 | 99.11 | 99.84 | 6                | 0.11 | 13.7     | 4.0    |
| $MWSS_A$ (Pa)            | 26.34                | 39.74 | 89.55 | 44.69 | 42.10 | 43.91 | 5.44  | 3.62  | 6                | 0.85 | 47.9     | 11.9   |
| $90WSS_A$ (Pa)           | 1.35                 | 2.45  | 5.87  | 2.24  | 4.85  | 8.35  | 0.43  | 0.41  | 4                | 0.28 | 56.5     | 11.7   |
| $N90WSS_A$ (-)           | 2.53                 | 1.82  | 2.26  | 2.24  | 2.20  | 2.30  | 1.61  | 1.93  | 5                | 0.85 | 12.6     | 3.1    |
